# Supplementary material for: Computational analysis of Cyclin D1 gene SNPs and association with breast cancer
Source: Oxford University Press journal article supplement (doi:10.1042/bsr20202269), 2021-01-01
Supplement: bsr-2020-2269_supp.pdf [file bsr-2020-2269_supp.pdf]

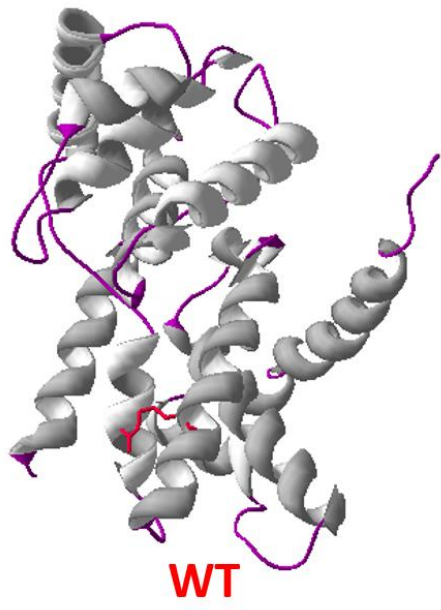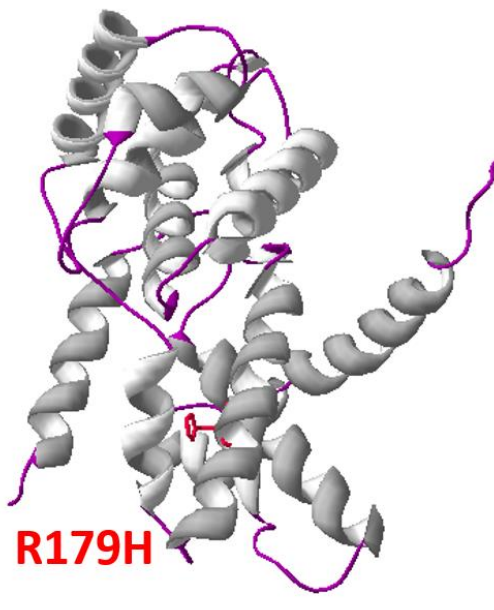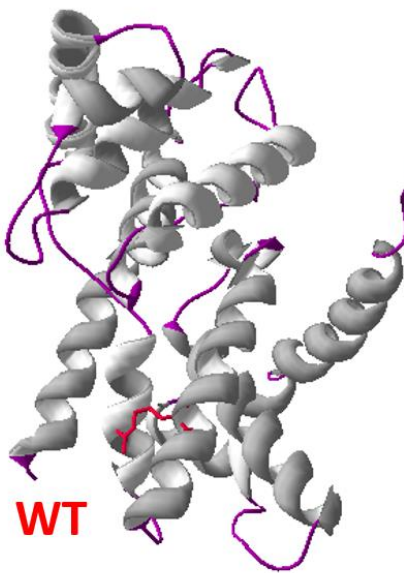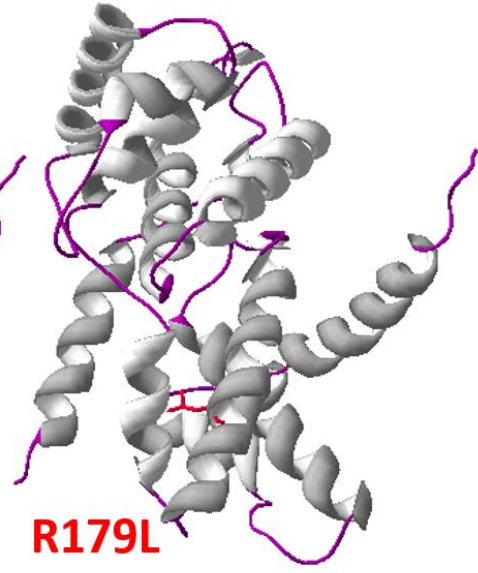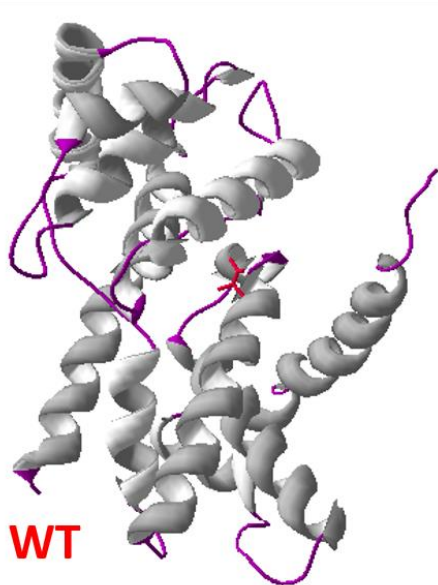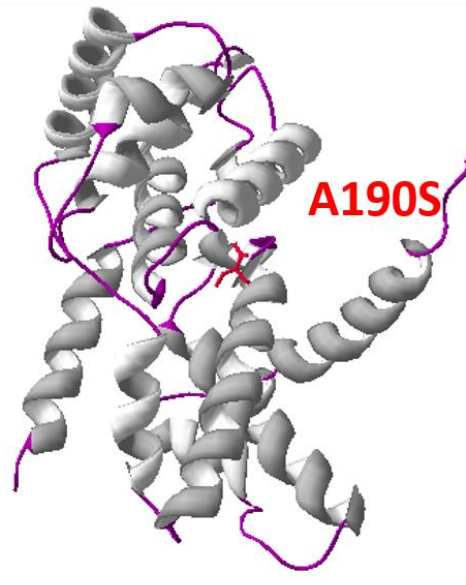

**Supplementary Figure 1.** The CPH model of WT cyclin D1 structure, and mutant cyclin D1 structures due to R179H, R17L and A190S SNPs

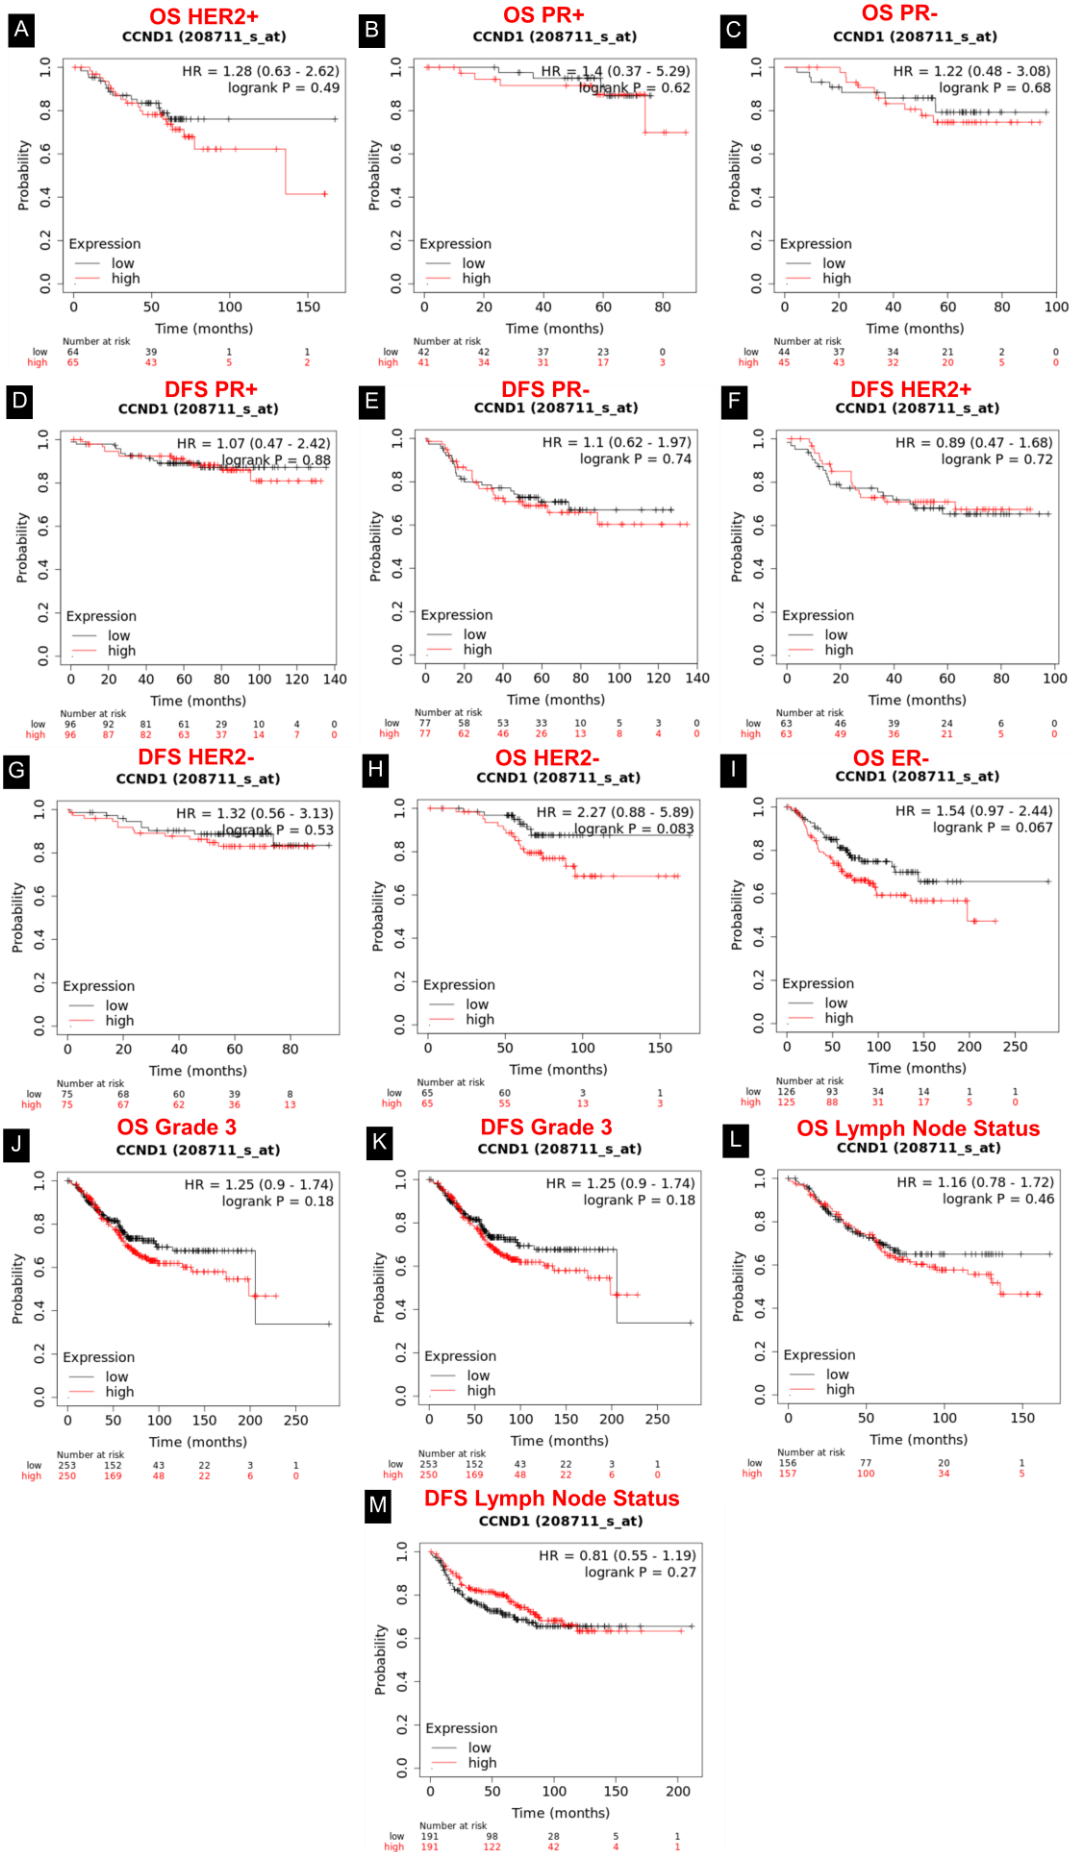

**Supplementary Figure 2.** The association of cyclin D1 with different clinical parameters in breast cancer patients. OS association with **A)** HER+ (n= 129), **B)** PR+ (n= 83) and **C)** PR- (n= 89). DFM association of breast cancer patients with **D)** PR+ (n= 192), **E)** PR- (n= 154), **F)** HER+ (n= 126), and **G)** HER- (n= 150)

Supplementary Table 1. *In silico* analysis of intronic splice region *CCND1* SNPs.

| No. | RS ID        | SNP                      | HSF <sup>a</sup><br>HSF matrix score (0-100)              |             |                |                                                           | SpliceView <sup>b</sup><br>Score (0-100) |                  | Sroogle <sup>c</sup>                                   |                                                |                                             | NetGene2 <sup>d</sup><br>confidence score<br>(0-1) |                  | FSplice <sup>e</sup><br>(Weight index) |                  | Prediction<br>of<br>possible<br>impact <sup>f</sup> |
|-----|--------------|--------------------------|-----------------------------------------------------------|-------------|----------------|-----------------------------------------------------------|------------------------------------------|------------------|--------------------------------------------------------|------------------------------------------------|---------------------------------------------|----------------------------------------------------|------------------|----------------------------------------|------------------|-----------------------------------------------------|
|     |              |                          | WT                                                        | Mu          | Variation<br>% | Interpretation                                            | WT                                       | Mu               | Element                                                | WT                                             | Mu                                          | WT                                                 | Mu               | WT                                     | Mu               |                                                     |
| 1   | rs374405138  | g.5411C>T,<br>c.198+4C>T | 44.25                                                     | 71.08       | +60.63         | Potential<br>alteration of<br>splicing. New<br>Donor Site | 84 DS                                    | 84 DS            | 5' SS                                                  | -3.80<br>(Delta-G)<br>6.79<br>(Max<br>entropy) | -3.90<br>(Delta-G)<br>4.48 (Max<br>entropy) | 0.70<br>DS                                         | 0.61 DS          | 7.36                                   | 6.66             | No Effect                                           |
| 2   | rs752676953  | g.5412G>A,<br>c.198+5G>A | 86.34                                                     | 74.18       | -14.08         | Probably<br>effecting<br>splicing                         | 84 DS                                    | 78 DS            | 5' SS                                                  | -3.80<br>(Delta-G)<br>6.79<br>(Max<br>entropy) | -3.80<br>(Delta-G)<br>2.02(Max<br>entropy)  | 0.70<br>DS                                         | Not<br>generated | W=<br>7.36                             | Not<br>generated | Probably<br>effecting                               |
| 3   | rs1456525574 | g.5413G>A,<br>c.198+6G>A | 86.34                                                     | 85.94       | -0.46          | Probably no<br>impact on<br>splicing                      | 84 DS                                    | 83 DS            | 5' SS                                                  | -3.80<br>(Delta-G)<br>6.79<br>(Max<br>entropy) | -3.80<br>(Delta-G)<br>5.51 (Max<br>entropy) | 0.70<br>DS                                         | 0.71 DS          | 7.36                                   | W=7.92           | No Effect                                           |
| 4   | rs1343339113 | g.5415G>A,<br>c.198+8G>A | No difference between<br>mutant and reference<br>sequence |             |                | Probably no<br>impact on<br>splicing                      | Not<br>predicted                         | Not<br>predicted | No difference between mutant and<br>reference sequence |                                                |                                             | 0.70<br>DS                                         | 0.52 DS          | 7.36                                   | 7.36             | No Effect                                           |
| 5   | rs1420743674 | g.6919C>T,<br>c.199-8C>T | 82.96                                                     | 82.34       | -0.75          | Probably no<br>impact on<br>splicing                      | 84 AS                                    | 84 AS            | 3' SS                                                  | 9.86<br>(Max<br>entropy)<br>80.21<br>(PSSM)    | 9.54 (Max<br>entropy)<br>80.80<br>(PSSM)    | 0.96                                               | 0.96             | 4.03                                   | 4.03             | No Effect                                           |
| 6   | rs758963834  | g.6922C>T,<br>c.199-5C>T | 82.96<br>AS                                               | 83.85<br>AS | +1.07          | Probably no<br>impact on<br>splicing                      | 84 AS                                    | 84 AS            | 3' SS                                                  | 9.86<br>(Max<br>entropy)<br>80.21<br>(PSSM)    | 9.51 (Max<br>entropy)<br>81.22<br>(PSSM)    | 0.96                                               | 0.96             | 4.03                                   | 4.03             | No Effect                                           |
| 7   | rs1339178943 | g.6923G>A,<br>c.199-4G>A | 82.96<br>AS                                               | 83.03<br>AS | +0.08          | Probably no<br>impact on                                  | 84 AS                                    | 84 AS            | 3' SS                                                  | 9.86<br>(Max                                   | 10.31 (Max<br>entropy)                      | 0.96<br>AS                                         | 0.97 AS<br>(H)   | 4.03                                   | 4.53             | No Effect                                           |

|    |              |                            |                                                           |             |        |                                                                     |                  |                  |                                                        |                                                    |                                                    |                     |                                     |       |              |           |  |
|----|--------------|----------------------------|-----------------------------------------------------------|-------------|--------|---------------------------------------------------------------------|------------------|------------------|--------------------------------------------------------|----------------------------------------------------|----------------------------------------------------|---------------------|-------------------------------------|-------|--------------|-----------|--|
|    |              |                            |                                                           |             |        | splicing                                                            |                  |                  |                                                        |                                                    | entropy)<br>80.21<br>(PSSM)                        | 80.45<br>(P<br>SSM) |                                     |       |              |           |  |
| 8  | rs1424359226 | g.7147C>G,<br>c.414+5C>G   | 81.06<br>DS                                               | 93.08<br>DS | +14.83 | Probably no<br>impact on<br>splicing                                | 81 DS            | 82 DS            | 5' SS                                                  | -3.60<br>(Delta-<br>G)<br>4.51<br>(Max<br>entropy) | -5.90<br>(Delta-G)<br><b>8.69</b> (Max<br>entropy) | 0.70<br>DS          | 0.99 DS<br>(H)                      | 6.24  | <b>12.82</b> | No Effect |  |
| 9  | rs1484194988 | g.7151delT,<br>c.414+9delT | No difference between<br>mutant and reference<br>sequence |             |        | Probably no<br>impact on<br>splicing                                | Not<br>predicted | Not<br>predicted | No difference between mutant and<br>reference sequence |                                                    |                                                    | 0.70<br>DS          | <b>0.39</b> DS                      | 6.24  | 6.24         | No Effect |  |
| 10 | rs762325000  | g.7720G>A,<br>c.415-8G>A   | 85.61<br>AS                                               | 85.54<br>AS | -0.08  | Probably no<br>impact on<br>splicing                                | 83 AS            | 83 AS            | 3' SS                                                  | 7.44<br>(Max<br>entropy)<br>81.57<br>(PSSM)        | 6.22 (Max<br>entropy)<br>81.61<br>(PSSM)           | 0.34<br>AS          | 0.20                                | 8.20  | 6.83         | No Effect |  |
| 11 | rs1240440953 | g.7723C>T,<br>c.415-5C>T   | 85.61<br>AS                                               | 86.50<br>AS | +1.04  | Probably no<br>impact on<br>splicing                                | 83 AS            | 84 AS            | 3' SS                                                  | 7.44<br>(Max<br>entropy)<br>81.57<br>(PSSM)        | 8.01 (Max<br>entropy)<br>82.58<br>(PSSM)           | 0.56                | 0.56                                | 8.20  | 9.57         | No effect |  |
| 12 | rs377200375  | g.7894C>T,<br>c.574+7C>T   | 56.84<br>DS                                               | 83.68<br>DS | +47.22 | <b>Potential<br/>alteration of<br/>splicing. New<br/>Donor Site</b> | Not<br>predicted | Not<br>predicted | No difference between mutant and<br>reference sequence |                                                    |                                                    | 0.95<br>DS<br>(H)   | 0.91 DS<br>(H)<br>New<br>donor site | 11.00 | 11.00        | No effect |  |
| 13 | rs931931114  | g.7896delG,<br>c.574+9delG | 76.89<br>AS                                               | 72.73<br>AS | -5.41  | Probably no<br>impact on<br>splicing                                | Not<br>predicted | Not<br>predicted | No difference between mutant and<br>reference sequence |                                                    |                                                    | 0.95<br>DS<br>(H)   | 0.95 DS<br>(H)                      | 11.00 | 11.00        | No effect |  |
| 14 | rs750369077  | g.7897G>T,<br>c.574+10G>T  | 76.89<br>AS                                               | 72.59<br>AS | -5.59  | Probably no<br>impact on<br>splicing                                | Not<br>predicted | Not<br>predicted | No difference between mutant and<br>reference sequence |                                                    |                                                    | 0.95<br>DS<br>(H)   | 0.95 DS<br>(H)                      | 11.00 | 11.00        | No effect |  |
| 15 | rs201881393  | g.11882T>C,<br>c.575-8T>C  | 89.65<br>AS                                               | 90.26<br>AS | +0.68  | Probably no<br>impact on<br>splicing                                | 92 AS            | 92AS             | 3' SS                                                  | 10.04<br>(Max<br>entropy)<br>88.71<br>(PSSM)       | 9.82 (Max<br>entropy)<br>88.12<br>(PSSM)           | 1.00<br>AS<br>(H)   | 1.00 AS<br>(H)                      | 13.18 | 12.30        | No effect |  |
| 16 | rs1443089370 | g.11883G>A,<br>c.575-7G>A  | 89.65<br>AS                                               | 89.69<br>AS | +0.04  | Probably no<br>impact on                                            | 92 AS            | 92 AS            | 3' SS                                                  | 10.04<br>(Max                                      | 9.68 (Max<br>entropy)                              | 1.00<br>AS          | 1.00 AS<br>(H)                      | 13.18 | 12.93        | No effect |  |

|    |              |                            |             |             |        | splicing                             |                  |                  |                                                        | entropy)<br>88.71<br>(PSSM)                  | 89.06<br>(PSSM)                           | (H)               |                |             |                               |           |
|----|--------------|----------------------------|-------------|-------------|--------|--------------------------------------|------------------|------------------|--------------------------------------------------------|----------------------------------------------|-------------------------------------------|-------------------|----------------|-------------|-------------------------------|-----------|
| 17 | rs776761881  | g.11885C>T,<br>c.575-5C>T  | 89.65<br>AS | 90.54<br>AS | +0.99  | Probably no<br>impact on<br>splicing | 92 AS            | 92 AS            | 3' SS                                                  | 10.04<br>(Max<br>entropy)<br>88.71<br>(PSSM) | 10.79 (Max<br>entropy)<br>89.72<br>(PSSM) | 1.00<br>AS<br>(H) | 1.00 AS<br>(H) | 13.18       | 13.30                         | No effect |
| 18 | rs1398886316 | g.12045G>A,<br>c.723+7G>A  | 84.35<br>DS | 85.51<br>DS | +1.38  | Probably no<br>impact on<br>splicing | Not<br>predicted | Not<br>predicted | No difference between mutant and<br>reference sequence |                                              |                                           | 1.00<br>DS<br>(H) | 1.00 DS<br>(H) | 16.18       | 16.18<br><br>6.94 (new<br>DS) | No effect |
| 19 | rs1389923822 | g.12047G>A,<br>c.723+9G>A  | 84.35<br>DS | 72.18<br>DS | -14.43 | Probably no<br>impact on<br>splicing | Not<br>predicted | Not<br>predicted | No difference between mutant and<br>reference sequence |                                              |                                           | 1.00<br>DS<br>(H) | 1.00 DS<br>(H) | 16.18       | 16.18<br><br>7.22 (new<br>DS) | No effect |
| 20 | rs371455093  | g.12048G>C,<br>c.723+10G>C | 84.35<br>DS | 84.11<br>DS | -0.28  | Probably no<br>impact on<br>splicing | Not<br>predicted | Not<br>predicted | No difference between mutant and<br>reference sequence |                                              |                                           | 1.00<br>DS<br>(H) | 1.00 DS<br>(H) | 16.18       | 16.18<br><br>5.26 (new<br>DS) | No effect |
| 21 | rs753060017  | g.15004T>C,<br>c.724-10T>C | 93.38<br>AS | 92.67<br>AS | -0.76  | Probably no<br>impact on<br>splicing | Not<br>predicted | Not<br>predicted | 3' SS                                                  | 10.71<br>(Max<br>entropy)<br>88.03<br>(PSSM) | 10.63 (Max<br>entropy)<br>87.02<br>(PSSM) | 1.00<br>AS<br>(H) | 1.00 AS<br>(H) | 13.60<br>AS | 12.97                         | No effect |
| 22 | rs571153521  | g.15008T>C,<br>c.724-6T>C  | 93.38<br>AS | 94.03<br>AS | +0.7   | Probably no<br>impact on<br>splicing | 93 AS            | 93 AS            | 3' SS                                                  | 10.71<br>(Max<br>entropy)<br>88.03<br>(PSSM) | 10.98 (Max<br>entropy)<br>87.93<br>(PSSM) | 1.00<br>AS<br>(H) | 1.00 AS<br>(H) | 13.60<br>AS | 10.60                         | No effect |
| 23 | rs764630402  | g.15010T>G,<br>c.724-4T>G  | 93.38<br>AS | 93.41<br>AS | +0.03  | Probably no<br>impact on<br>splicing | 93 AS            | 93 AS            | 3' SS                                                  | 10.71<br>(Max<br>entropy)<br>88.03<br>(PSSM) | 11.20 (Max<br>entropy)<br>87.51<br>(PSSM) | 1.00<br>AS<br>(H) | 1.00 AS<br>(H) | 13.60<br>AS | 10.60                         | No effect |

Supplementary Table 2. *In silico* analysis of *CCND1* reported missense SNPs.

|    | RS ID        | Missense substitutions                         | PolyPhen-2 <sup>a</sup> |                   | SIFT <sup>b</sup> |            | PROVEAN <sup>c</sup> |             | SNP & GO <sup>d</sup> |            | PANTHER <sup>e</sup> |              | Prediction of possible impact <sup>f</sup> |
|----|--------------|------------------------------------------------|-------------------------|-------------------|-------------------|------------|----------------------|-------------|-----------------------|------------|----------------------|--------------|--------------------------------------------|
|    |              |                                                | scores                  | Prediction        | Scores (0-1)      | Prediction | Score                | Prediction  | Probability           | Prediction | Probability          | Prediction   |                                            |
| 1  | rs572037183  | NM_053056.2:c.4G>A,<br>NP_444284.1:p.Glu2Gln   | 0.145                   | Benign            | 0.15              | Tolerant   | -0.84                | Neutral     | 0.581                 | Disease    | NA                   | Unclassified | Benign                                     |
|    |              | NM_053056.2:c.4G>C,<br>NP_444284.1:p.Glu2Lys   | 0.023                   | Benign            | 0.13              | Tolerant   | -0.96                | Neutral     | 0.803                 | Disease    | NA                   | Unclassified | Benign                                     |
| 2  | rs545664320  | NM_053056.2:c.8A>G,<br>NP_444284.1:p.His3Arg   | 0.244                   | Benign            | 0.37              | Tolerant   | -1.3                 | Neutral     | 0.665                 | Disease    | NA                   | Unclassified | Benign                                     |
| 3  | rs1356268873 | NM_053056.2:c.12G>T,<br>NP_444284.1:p.Gln4His  | 0.904                   | Probably Damaging | 0.02              | Damaging   | -1.49                | Neutral     | 0.431                 | Neutral    | NA                   | Unclassified | Benign                                     |
| 4  | rs993495966  | NM_053056.2:c.19T>A,<br>NP_444284.1:p.Cys7Ser  | 0.999                   | Probably Damaging | 0.01              | Damaging   | -6.75                | Deleterious | 0.978                 | Disease    | NA                   | Unclassified | Highly Damaging                            |
| 5  | rs1486252402 | NM_053056.2:c.20G>C,<br>NP_444284.1:p.Cys7Ser  | 0.999                   | Probably Damaging | 0.01              | Damaging   | -6.75                | Deleterious | 0.978                 | Disease    | NA                   | Unclassified | Highly Damaging                            |
| 6  | rs773884084  | NM_053056.2:c.22T>G,<br>NP_444284.1:p.Cys8Gly  | 0.021                   | Benign            | 0.06              | Tolerant   | -6.46                | Deleterious | 0.978                 | Disease    | 0.421                | Neutral      | Benign                                     |
| 7  | rs1340132260 | NM_053056.2:c.23G>A,<br>NP_444284.1:p.Cys8Tyr  | 0.919                   | Probably Damaging | 0.19              | Tolerant   | -5.69                | Deleterious | 0.958                 | Disease    | 0.289                | Neutral      | Highly Damaging                            |
| 8  | rs761266790  |                                                |                         |                   |                   |            |                      |             |                       |            |                      |              |                                            |
| 9  | rs1372181670 | NM_053056.2:c.40C>A,<br>NP_444284.1:p.Arg14Ser | 0.411                   | Benign            | 0.74              | Tolerant   | -2.13                | Neutral     | 0.879                 | Disease    | 0.282                | Neutral      | Benign                                     |
| 10 | rs557545630  | NM_053056.2:c.43C>A,<br>NP_444284.1:p.Arg15Ser | 0.994                   | Probably Damaging | 0.01              | Damaging   | -3.8                 | Deleterious | 0.957                 | Disease    | 0.361                | Neutral      | Highly Damaging                            |
| 11 | rs1299107729 | NM_053056.2:c.46G>T,<br>NP_444284.1:p.Ala16Ser | 0.998                   | Probably Damaging | 0.06              | Tolerant   | -1.74                | Neutral     | 0.961                 | Disease    | 0.565                | Disease      | Highly Damaging                            |
| 12 | rs772857967  | NM_053056.2:c.52C>G,<br>NP_444284.1:p.Pro18Ala | 0.001                   | Benign            | 0.75              | Tolerant   | -2.34                | Neutral     | 0.695                 | Disease    | 0.293                | Neutral      | Benign                                     |
|    |              | NM_053056.2:c.52C>T,<br>NP_444284.1:p.Pro18Ser | 0.000                   | Benign            | 0.70              | Tolerant   | -2.26                | Neutral     | 0.780                 | Disease    | 0.266                | Neutral      | Benign                                     |
| 13 | rs1417631865 | NM_053056.2:c.57T>A,<br>NP_444284.1:p.Asp19Glu | 0.987                   | Probably Damaging | 0.05              | Tolerant   | -2.85                | Deleterious | 0.960                 | Disease    | 0.444                | Neutral      | Highly Damaging                            |
| 14 | rs766170770  | NM_053056.2:c.61A>G,                           | 0.645                   | Possibly          | 0.36              | Tolerant   | -2                   | Neutral     | 0.810                 | Disease    | 0.296                | Neutral      | Benign                                     |



|    |              |                                                  |       |                      |      |          |       |             |       |                    |       |              |                    |
|----|--------------|--------------------------------------------------|-------|----------------------|------|----------|-------|-------------|-------|--------------------|-------|--------------|--------------------|
|    |              | NP_444284.1:p.Asn21Asp                           |       | damaging             |      |          |       |             |       |                    |       |              |                    |
| 15 | rs753863475  | NM_053056.2:c.67C>T,<br>NP_444284.1:p.Leu23Phe   | 0.01  | Benign               | 0.06 | Tolerant | -2.11 | Neutral     | 0.876 | Disease            | 0.487 | Neutral      | Benign             |
| 16 | rs1400812649 | NM_053056.2:c.74A>G,<br>NP_444284.1:p.Asp25Gly   | 0.876 | Possibly<br>damaging | 0.01 | Damaging | -4.51 | Deleterious | 0.986 | Disease            | 0.800 | Disease      | Highly<br>Damaging |
| 17 | rs2220247    | NM_053056.2:c.88G>T,<br>NP_444284.1:p.Ala30Ser,  | 0.000 | Benign               | 0.47 | Tolerant | 0.79  | Neutral     | 0.628 | Disease<br>Disease | 0.187 | Neutral      | Benign             |
|    |              | NM_053056.2:c.88G>A,<br>NP_444284.1:p.Ala30Thr   | 0.000 | Benign               | 0.62 | Tolerant | 0.16  | Neutral     | 0.658 | Disease            | 0.208 | Neutral      | Benign             |
| 18 | rs1415272481 | NM_053056.2:c.89C>A,<br>NP_444284.1:p.Ala30Asp   | 0.074 | Benign               | 0.07 | Tolerant | -0.43 | Neutral     | 0.933 | Disease            | 0.355 | Neutral      | Benign             |
| 19 | rs746088878  | NM_053056.2:c.106G>A,<br>NP_444284.1:p.Glu36Lys  | 0.116 | Benign               | 0.02 | Damaging | -2.8  | Deleterious | 0.803 | Disease            | 0.233 | Neutral      | Highly<br>Damaging |
| 20 | rs1482952019 | NM_053056.2:c.108G>T,<br>NP_444284.1:p.Glu36Asp  | 0     | Benign               | 0.30 | Tolerant | -0.49 | Neutral     | 0.897 | Disease            | 0.546 | Disease      | Benign             |
| 21 | rs1263446681 | NM_053056.2:c.110C>G,<br>NP_444284.1:p.Thr37Ser  | 0.001 | Benign               | 0.02 | Damaging | -0.73 | Neutral     | 0.645 | Disease            | 0.276 | Neutral      | Benign             |
| 22 | rs780366497  | NM_053056.2:c.114C>G,<br>NP_444284.1:p.Cys38Trp  | 0.989 | Probably<br>Damaging | 0.03 | Damaging | -0.53 | Neutral     | 0.959 | Disease            | 0.600 | Disease      | Highly<br>Damaging |
| 23 | rs749614691  | NM_053056.2:c.122C>T,<br>NP_444284.1:p.Ser41Leu  | 0.865 | Possibly<br>damaging | 0.14 | Tolerant | -3.23 | Deleterious | 0.825 | Disease            | 0.574 | Disease      | Highly<br>Damaging |
| 24 | rs1173840555 | NM_053056.2:c.135C>A,<br>NP_444284.1:p.Phe45Leu  | 0.09  | Benign               | 0.06 | Tolerant | -4.61 | Deleterious | 0.690 | Disease            | 0.302 | Neutral      | Benign             |
| 25 | rs747665638  | NM_053056.2:c.136A>G,<br>NP_444284.1:p.Lys46Glu  | 0.012 | Benign               | 0.25 | Tolerant | -1.27 | Neutral     | 0.373 | Neutral            | NA    | Unclassified | Benign             |
| 26 | rs1332727287 | NM_053056.2:c.148A>G,<br>NP_444284.1:p.Lys50Glu  | 0     | Benign               | 0.11 | Tolerant | -1.38 | Neutral     | 0.826 | Disease            | 0.311 | Neutral      | Benign             |
| 27 | rs772785280  | NM_053056.2:c.153G>C,<br>NP_444284.1:p.Glu51Asp  | 0     | Benign               | 0.08 | Tolerant | 0.33  | Neutral     | 0.410 | Neutral            | 0.219 | Neutral      |                    |
| 28 | rs760341225  | NM_053056.2:c.161C>G,<br>NP_444284.1:p.Pro54Arg  | 1     | Probably<br>Damaging | 0.00 | Damaging | -6.6  | Deleterious | 0.928 | Disease            | 0.700 | Disease      | Highly<br>Damaging |
| 29 | rs765904377  | NM_053056.2:c.166A>T,<br>NP_444284.1:p.Met56Leu  | 0.14  | Benign               | 0.09 | Tolerant | -2.18 | Neutral     | 0.956 | Disease            | 0.535 | Disease      | Benign             |
| 30 | rs748632355  | NM_053056.2:c.185C>A,<br>NP_444284.1:p.Thr62Asn, | 0.06  | Benign               | 0.45 | Tolerant | -1.95 | Neutral     | 0.904 | Disease            | 0.388 | Neutral      | Benign             |

|    |              |                                                  |       |                      |      |          |       |             |       |         |       |         |                    |
|----|--------------|--------------------------------------------------|-------|----------------------|------|----------|-------|-------------|-------|---------|-------|---------|--------------------|
|    |              | NM_053056.2:c.185C>T,<br>NP_444284.1:p.Thr62Ile  | 0.854 | Possibly<br>damaging | 0.32 | Tolerant | -2.96 | Deleterious | 0.955 | Disease | 0.705 | Disease | Highly<br>Damaging |
| 31 | rs1299820976 | NM_053056.2:c.190A>C,<br>NP_444284.1:p.Met64Leu  | 0.034 | Benign               | 0.06 | Tolerant | -2.23 | Neutral     | 0.731 | Disease | 0.429 | Neutral | Benign             |
| 32 | rs759345822  | NM_053056.2:c.197A>C,<br>NP_444284.1:p.Glu66Ala, | 0.981 | Probably<br>Damaging | 0.00 | Damaging | -4.67 | Deleterious | 0.917 | Disease | 0.588 | Disease | Highly<br>Damaging |
|    |              | NM_053056.2:c.197A>G,<br>NP_444284.1:p.Glu66Gly  | 0.994 | Probably<br>Damaging | 0.00 | Damaging | -5.3  | Deleterious | 0.943 | Disease | 0.737 | Disease | Highly<br>Damaging |
| 33 | rs769045064  | NM_053056.2:c.206A>G,<br>NP_444284.1:p.Glu69Gly  | 0.055 | Benign               | 0.03 | Damaging | -5.99 | Deleterious | 0.882 | Disease | 0.721 | Disease | Highly<br>Damaging |
| 34 | rs1381472659 | NM_053056.2:c.220G>A,<br>NP_444284.1:p.Glu74Lys  | 0.415 | Benign               | 0.03 | Damaging | -3.15 | Deleterious | 0.853 | Disease | 0.444 | Neutral | Highly<br>Damaging |
| 35 | rs1171564865 | NM_053056.2:c.223G>A,<br>NP_444284.1:p.Glu75Lys  | 0.224 | Benign               | 0.01 | Damaging | -3.09 | Deleterious | 0.932 | Disease | 0.528 | Disease | Highly<br>Damaging |
| 36 | rs778080996  | NM_053056.2:c.226G>A,<br>NP_444284.1:p.Glu76Lys  | 0.782 | Possibly<br>damaging | 0.07 | Tolerant | -3.25 | Deleterious | 0.979 | Disease | 0.495 | Neutral | Highly<br>Damaging |
| 37 | rs746530862  | NM_053056.2:c.228G>C,<br>NP_444284.1:p.Glu76Asp  | 0.001 | Benign               | 0.55 | Tolerant | -1.08 | Neutral     | 0.842 | Disease | 0.399 | Neutral | Benign             |
| 38 | rs781047821  | NM_053056.2:c.235C>T,<br>NP_444284.1:p.Pro79Ser  | 0.851 | Possibly<br>damaging | 0.01 | Damaging | -6.25 | Deleterious | 0.864 | Disease | 0.483 | Neutral | Highly<br>Damaging |
| 39 | rs1188165799 | NM_053056.2:c.241G>A,<br>NP_444284.1:p.Ala81Thr  | 0.995 | Possibly<br>damaging | 0.05 | Tolerant | -2.79 | Deleterious | 0.913 | Disease | 0.885 | Disease | Highly<br>Damaging |
| 40 | rs1471534715 | NM_053056.2:c.244A>G,<br>NP_444284.1:p.Met82Val  | 0.002 | Benign               | 0.41 | Tolerant | -2.75 | Deleterious | 0.513 | Disease | 0.321 | Neutral | Benign             |
| 41 | rs1359042394 | NM_053056.2:c.277C>A,<br>NP_444284.1:p.Pro93Ser, | 0.01  | Benign               | 0.17 | Tolerant | -5.11 | Deleterious | 0.514 | Disease | 0.233 | Neutral | Benign             |
|    |              | NM_053056.2:c.277C>T,<br>NP_444284.1:p.Pro93Thr  | 0.004 | Benign               | 0.14 | Tolerant | -5.37 | Deleterious | 0.577 | Disease | 0.489 | Neutral | Benign             |
| 42 | rs1419585038 | NM_053056.2:c.278C>T,<br>NP_444284.1:p.Pro93Leu  | 0.164 | Benign               | 0.01 | Damaging | -7.15 | Deleterious | 0.828 | Disease | 0.617 | Disease | Highly<br>Damaging |
| 43 | rs774091629  | NM_053056.2:c.280G>T,<br>NP_444284.1:p.Val94Leu  | 0     | Benign               | 0.39 | Tolerant | -0.84 | Neutral     | 0.746 | Disease | 0.245 | Neutral | Benign             |
| 44 | rs760878237  | NM_053056.2:c.285A>C,<br>NM_053056.2:c.285A>G,   | 0.011 | Benign               | 0.18 | Tolerant | -2.52 | Deleterious | 0.729 | Disease | 0.342 | Neutral | Benign             |

|    |              |                                                                          |       |                   |      |          |       |             |                |         |                |                    |                 |
|----|--------------|--------------------------------------------------------------------------|-------|-------------------|------|----------|-------|-------------|----------------|---------|----------------|--------------------|-----------------|
|    |              | NP_444284.1:p.Lys95Asn                                                   |       |                   |      |          |       |             |                |         |                |                    |                 |
| 45 | rs148113872  | NM_053056.2:c.288G>C,<br>NM_053056.2:c.288G>T,<br>NP_444284.1:p.Lys96Asn | 0.999 | Probably Damaging | 0.00 | Damaging | -4.23 | Deleterious | 0.957          | Disease | 0.673          | Disease            | Highly Damaging |
| 46 | rs140967247  | NM_053056.2:c.292C>A,<br>NP_444284.1:p.Arg98Ser                          | 0.195 | Benign            | 0.41 | Tolerant | -2.13 | Neutral     | 0.812          | Disease | 0.341          | Neutral            | Benign          |
| 47 | rs1480433568 | NM_053056.2:c.302T>G,<br>NP_444284.1:p.Leu101Arg                         | 0.998 | Probably Damaging | 0.00 | Damaging | -5.05 | Deleterious | 0.989          | Disease | 0.982          | Disease            | Highly Damaging |
| 48 | rs753115532  | NM_053056.2:c.310G>T,<br>NP_444284.1:p.Ala104Ser,                        | 0.987 | Probably          | 0.22 | Tolerant | -1.79 | Neutral     | 0.902          | Disease | 0.498          | Neutral            | Benign          |
|    |              | NM_053056.2:c.310G>A,<br>NP_444284.1:p.Ala104Thr                         | 0.999 | Damaging          | 0.26 | Tolerant | -2.46 | Neutral     | 0.869          | Disease | 0.564          | Disease            | Highly Damaging |
| 49 | rs764727750  | NM_053056.2:c.319A>C,<br>NP_444284.1:p.Met107Leu                         | 0.003 | Benign            | 0.49 | Tolerant | -1.84 | Neutral     | 0.391          | Neutral | 0.417          | Neutral            | Benign          |
| 50 | rs751995000  | NM_053056.2:c.324C>A,<br>NP_444284.1:p.Phe108Leu                         | 0.104 | Benign            | 0.48 | Tolerant | -2.9  | Neutral     | 0.774          | Disease | 0.266          | Neutral            | Benign          |
| 51 | rs374998781  | NM_053056.2:c.341A>G,<br>NP_444284.1:p.Lys114Arg                         | 0.048 | Benign            | 0.50 | Tolerant | -1.21 | Deleterious | 0.746          | Disease | 0.240          | Neutral            | Benign          |
| 52 | rs755854763  | NM_053056.2:c.350T>A,<br>NP_444284.1:p.Ile117Asn                         | 0.09  | Benign            | 0.57 | Tolerant | -2.25 | Neutral     | 0.893          | Disease | 0.387          | Neutral            | Benign          |
| 53 | rs1176401077 | NM_053056.2:c.351C>G,<br>NP_444284.1:p.Ile117Met                         | 0.059 | Benign            | 0.14 | Tolerant | -0.57 | Neutral     | 0.893<br>0.883 | Disease | 0.387<br>0.622 | Neutral<br>Disease | Benign          |
| 54 | rs1469991905 | NM_053056.2:c.361G>A,<br>NP_444284.1:p.Ala121Thr                         | 0.909 | Possibly damaging | 0.10 | Tolerant | -2.26 | Neutral     | 0.915          | Disease | 0.601          | Disease            | Highly Damaging |
| 55 | rs768334579  | NM_053056.2:c.364G>A,<br>NP_444284.1:p.Glu122Lys                         | 0.787 | Possibly damaging | 0.02 | Damaging | -2.95 | Neutral     | 0.930          | Disease | 0.517          | Disease            | Highly Damaging |
| 56 | rs1373598994 | NM_053056.2:c.365A>G,<br>NP_444284.1:p.Glu122Gly                         | 0.289 | Benign            | 0.01 | Damaging | -5.42 | Deleterious | 0.808          | Disease | 0.530          | Disease            | Highly Damaging |
| 57 | rs1449765247 | NM_053056.2:c.367A>C,<br>NP_444284.1:p.Lys123Gln                         | 0.746 | Possibly damaging | 0.05 | Damaging | -3.14 | Deleterious | 0.608          | Disease | 0.373          | Neutral            | Highly Damaging |
| 58 | rs774409065  | NM_053056.2:c.368A>T,<br>NP_444284.1:p.Lys123Met                         | 0.592 | Possibly damaging | 0.01 | Damaging | -4.79 | Deleterious | 0.834          | Disease | 0.819          | Disease            | Highly Damaging |
| 59 | rs748059951  | NM_053056.2:c.371T>C,<br>NP_444284.1:p.Leu124Pro                         | 1     | Probably Damaging | 0.00 | Damaging | -6.28 | Deleterious | 0.989          | Disease | 0.974          | Disease            | Highly Damaging |
| 60 | rs1329584649 | NM_053056.2:c.376A>C,<br>NP_444284.1:p.Ile126Leu                         | 0.003 | Benign            | 0.14 | Tolerant | -1.31 | Deleterious | 0.895          | Disease | 0.509          | Disease            | Highly Damaging |
| 61 | rs1375845153 | NM_053056.2:c.379T>C,                                                    | 0.999 | Probably          | 0.01 | Damaging | -4.35 | Neutral     | 0.946          | Disease | 0.855          | Disease            | Highly          |

|    |              |                                                   |       |                      |      |          |       |             |       |         |       |         |                    |
|----|--------------|---------------------------------------------------|-------|----------------------|------|----------|-------|-------------|-------|---------|-------|---------|--------------------|
|    |              | NP_444284.1:p.Tyr127His                           |       | Damaging             |      |          |       |             |       |         |       |         | Damaging           |
| 62 | rs1312761797 | NM_053056.2:c.382A>G,<br>NP_444284.1:p.Thr128Ala  | 0.892 | Possibly<br>damaging | 0.01 | Damaging | -4.17 | Deleterious | 0.837 | Disease | 0.395 | Neutral | Highly<br>Damaging |
| 63 | rs771952150  | NM_053056.2:c.385G>A,<br>NP_444284.1:p.Asp129Asn  | 0.951 | Possibly<br>damaging | 0.01 | Damaging | -4.29 | Deleterious | 0.960 | Disease | 0.670 | Disease | Highly<br>Damaging |
| 64 | rs1050971    | NM_053056.2:c.388A>G,<br>NP_444284.1:p.Asn130Asp, | 0.194 | Benign               | 0.06 | Tolerant | -3.65 | Deleterious | 0.923 | Disease | 0.916 | Disease | Highly<br>Damaging |
|    |              | NM_053056.2:c.388A>T,<br>NP_444284.1:p.Asn130Tyr  | 0.31  | Benign               | 0.12 | Tolerant | -4.91 | Deleterious | 0.648 | Disease | 0.257 | Neutral | Benign             |
| 65 | rs1131439    | NM_053056.2:c.389A>G,<br>NP_444284.1:p.Asn130Ser  | 0.196 | Benign               | 0.10 | Tolerant | -3.52 | Deleterious | 0.876 | Disease | 0.926 | Disease | Highly<br>Damaging |
| 66 | rs759551813  | NM_053056.2:c.392C>T,<br>NP_444284.1:p.Ser131Phe  | 0.982 | Probably<br>Damaging | 0.00 | Damaging | -4.95 | Deleterious | 0.956 | Disease | 0.691 | Disease | Highly<br>Damaging |
| 67 | rs866931401  | NM_053056.2:c.398G>A,<br>NP_444284.1:p.Arg133Gln, | 0     | Benign               | 0.30 | Tolerant | -0.96 | Neutral     | 0.794 | Disease | 0.382 | Neutral | Benign             |
|    |              | NM_053056.2:c.398G>T,<br>NP_444284.1:p.Arg133Leu  | 0     | Benign               | 0.15 | Tolerant | -2.19 | Neutral     | 0.934 | Disease | 0.548 | Disease | Benign             |
| 68 | rs765498502  | NM_053056.2:c.400C>T,<br>NP_444284.1:p.Pro134Ser  | 0.185 | Benign               | 0.57 | Tolerant | -3.62 | Deleterious | 0.718 | Disease | 0.490 | Neutral | Benign             |
| 69 | rs763443319  | NM_053056.2:c.403G>A,<br>NP_444284.1:p.Glu135Lys  | 0.001 | Benign               | 0.50 | Tolerant | -1.2  | Neutral     | 0.781 | Disease | 0.427 | Neutral | Benign             |
| 70 | rs764335132  | NM_053056.2:c.404A>T,<br>NP_444284.1:p.Glu135Val  | 0.003 | Benign               | 0.10 | Tolerant | -3.74 | Deleterious | 0.882 | Disease | 0.538 | Disease | Highly<br>Damaging |
| 71 | rs1184664065 | NM_053056.2:c.407A>C,<br>NP_444284.1:p.Glu136Ala  | 0.751 | Possibly<br>damaging | 0.01 | Tolerant | -4.63 | Deleterious | 0.896 | Disease | 0.490 | Neutral | Benign             |
| 72 | rs752157015  | NM_053056.2:c.409C>A,<br>NP_444284.1:p.Leu137Met  | 0.99  | Probably<br>Damaging | 0.03 | Damaging | -1.66 | Neutral     | 0.935 | Disease | 0.823 | Disease | Highly<br>Damaging |
| 73 | rs1268871232 | NM_053056.2:c.417A>C,<br>NP_444284.1:p.Gln139His  | 0.001 | Benign               | 0.13 | Tolerant | -1.96 | Neutral     | 0.806 | Disease | 0.669 | Disease | Benign             |
| 74 | rs1260695584 | NM_053056.2:c.427C>T,<br>NP_444284.1:p.Leu143Phe  | 0.322 | Benign               | 0.05 | Damaging | -3.07 | Deleterious | 0.832 | Disease | 0.824 | Disease | Highly<br>Damaging |
| 75 | rs766855822  | NM_053056.2:c.428T>C,<br>NP_444284.1:p.Leu143Pro  | 0.544 | Possibly<br>damaging | 0.00 | Damaging | -5.82 | Deleterious | 0.969 | Disease | 0.937 | Disease | Highly<br>Damaging |
| 76 | rs753296773  | NM_053056.2:c.430C>G,                             | 0.004 | Benign               | 1.00 | Tolerant | 1.20  | Neutral     | 0.254 | Neutral | 0.556 | Disease | Benign             |

|    |              |                                                                           |       |                      |      |          |       |             |       |         |       |         |                    |
|----|--------------|---------------------------------------------------------------------------|-------|----------------------|------|----------|-------|-------------|-------|---------|-------|---------|--------------------|
|    |              | NP_444284.1:p.Leu144Val                                                   |       |                      |      |          |       |             |       |         |       |         |                    |
| 77 | rs374420164  | NM_053056.2:c.442C>T,<br>NP_444284.1:p.Leu148Phe                          | 1     | Probably<br>Damaging | 0.00 | Damaging | -3.84 | Deleterious | 0.952 | Disease | 0.943 | Disease | Highly<br>Damaging |
| 78 | rs1203615889 | NM_053056.2:c.454C>A,<br>NP_444284.1:p.Leu152Met                          | 0.992 | Probably<br>Damaging | 0.08 | Tolerant | -1.51 | Neutral     | 0.641 | Disease | 0.284 | Neutral | Benign             |
| 79 | rs752345237  | NM_053056.2:c.460G>C,<br>NP_444284.1:p.Ala154Pro,                         | 0.994 | Probably<br>Damaging | 0.01 | Damaging | -4.02 | Deleterious | 0.950 | Disease | 0.490 | Neutral | Highly<br>Damaging |
|    |              | NM_053056.2:c.460G>T,<br>NP_444284.1:p.Ala154Ser                          | 0.087 | Benign               | 0.43 | Tolerant | -1.39 | Neutral     | 0.679 | Disease | 0.235 | Neutral | Benign             |
| 80 | rs1292226646 | NM_053056.2:c.463A>G,<br>NP_444284.1:p.Met155Val                          | 0.001 | Benign               | 1.00 | Tolerant | 1.09  | Neutral     | 0.460 | Neutral | 0.691 | Disease | Benign             |
| 81 | rs11263523   | NM_053056.2:c.474C>A,<br>NM_053056.2:c.474C>G,<br>NP_444284.1:p.His158Gln | 0.093 | Benign               | 0.20 | Tolerant | -4.34 | Deleterious | 0.950 | Disease | 0.685 | Disease | Highly<br>Damaging |
| 82 | rs781118003  | NM_053056.2:c.475G>A,<br>NP_444284.1:p.Asp159Asn                          | 0.998 | Probably<br>Damaging | 0.01 | Damaging | -4.67 | Deleterious | 0.956 | Disease | 0.747 | Disease | Highly<br>Damaging |
| 83 | rs749340325  | NM_053056.2:c.476A>G,<br>NP_444284.1:p.Asp159Gly                          | 0.993 | Probably<br>Damaging | 0.00 | Damaging | -6.59 | Deleterious | 0.915 | Disease | 0.648 | Disease | Highly<br>Damaging |
| 84 | rs1447014281 | NM_053056.2:c.483T>G,<br>NP_444284.1:p.Ile161Met                          | 0.925 | Possibly<br>damaging | 0.01 | Damaging | -1.76 | Neutral     | 0.937 | Disease | 0.699 | Disease | Highly<br>Damaging |
| 85 | rs1332977808 | NM_053056.2:c.485A>G,<br>NP_444284.1:p.Glu162Gly                          | 0.304 | Benign               | 0.06 | Tolerant | -4.4  | Deleterious | 0.947 | Disease | 0.709 | Disease | Highly<br>Damaging |
| 86 | rs768767169  | NM_053056.2:c.488A>G,<br>NP_444284.1:p.His163Arg                          | 0.927 | Possibly<br>damaging | 0.02 | Damaging | -5.56 | Deleterious | 0.904 | Disease | 0.811 | Disease | Highly<br>Damaging |
| 87 | rs537363548  | NM_053056.2:c.490T>C,<br>NP_444284.1:p.Phe164Leu                          | 0.206 | Benign               | 0.19 | Tolerant | -0.87 | Neutral     | 0.882 | Disease | 0.273 | Neutral | Benign             |
| 88 | rs1432185835 | NM_053056.2:c.493C>G,<br>NP_444284.1:p.Leu165Val                          | 0.723 | Possibly<br>damaging | 0.05 | Tolerant | -2.54 | Deleterious | 0.882 | Disease | 0.511 | Disease | Highly<br>Damaging |
| 89 | rs1261290754 | NM_053056.2:c.505C>T,<br>NP_444284.1:p.Pro169Ser                          | 0.167 | Benign               | 0.21 | Tolerant | -4.61 | Deleterious | 0.500 | Disease | 0.299 | Neutral | Benign             |
| 90 | rs548963461  | NM_053056.2:c.509A>T,<br>NP_444284.1:p.Glu170Val                          | 0     | Benign               | 0.58 | Tolerant | 2.49  | Neutral     | 0.582 | Disease | 0.237 | Neutral | Benign             |
| 91 | rs747336419  | NM_053056.2:c.510G>C,<br>NP_444284.1:p.Glu170Asp                          | 0     | Benign               | 0.07 | Tolerant | -0.86 | Neutral     | 0.680 | Disease | 0.293 | Neutral | Benign             |
| 92 | rs1373641771 | NM_053056.2:c.512C>T,                                                     | 0.003 | Benign               | 0.57 | Tolerant | -1.21 | Neutral     | 0.766 | Disease | 0.335 | Neutral | Benign             |

|     |              |                                                   |       |                      |      |          |       |             |       |         |       |              |                    |
|-----|--------------|---------------------------------------------------|-------|----------------------|------|----------|-------|-------------|-------|---------|-------|--------------|--------------------|
|     |              | NP_444284.1:p.Ala171Val                           |       |                      |      |          |       |             |       |         |       |              |                    |
| 93  | rs374062310  | NM_053056.2:c.522C>G,<br>NP_444284.1:p.Asn174Lys  | 0.01  | Benign               | 1.00 | Tolerant | -0.36 | Neutral     | 0.586 | Disease | NA    | Unclassified | Benign             |
| 94  | rs1175448240 | NM_053056.2:c.523A>G,<br>NP_444284.1:p.Lys175Glu  | 0.002 | Benign               | 1.00 | Tolerant | -1.43 | Neutral     | 0.503 | Disease | NA    | Unclassified | Benign             |
| 95  | rs777185874  | NM_053056.2:c.526C>G,<br>NP_444284.1:p.Gln176Glu  | 0     | Benign               | 1.00 | Tolerant | -0.42 | Neutral     | 0.474 | Neutral | NA    | Unclassified | Benign             |
| 96  | rs1433903280 | NM_053056.2:c.527A>T,<br>NP_444284.1:p.Gln176Leu  | 0     | Benign               | 0.32 | Tolerant | -2.41 | Neutral     | 0.392 | Neutral | NA    | Unclassified | Benign             |
| 97  | rs143479406  | NM_053056.2:c.536G>A,<br>NP_444284.1:p.Arg179His, | 0.919 | Possibly<br>damaging | 0.05 | Tolerant | -3.84 | Deleterious | 0.907 | Disease | NA    | Unclassified | Highly<br>Damaging |
|     |              | NM_053056.2:c.536G>T,<br>NP_444284.1:p.Arg179Leu  | 0.947 | Possibly<br>damaging | 0.02 | Damaging | -5.10 | Deleterious | 0.837 | Disease | 0.268 | Neutral      | Highly<br>Damaging |
| 98  | rs1176469241 | NM_053056.2:c.543C>A,<br>NP_444284.1:p.His181Gln  | 0.903 | Possibly<br>damaging | 0.03 | Damaging | -7.39 | Deleterious | 0.898 | Disease | 0.426 | Neutral      | Highly<br>Damaging |
| 99  | rs1434771092 | NM_053056.2:c.547C>A,<br>NP_444284.1:p.Gln183Lys  | 0.237 | Benign               | 0.04 | Damaging | -3.08 | Deleterious | 0.881 | Disease | 0.508 | Disease      | Highly<br>Damaging |
| 100 | rs1173908293 | NM_053056.2:c.551C>G,<br>NP_444284.1:p.Thr184Ser  | 0.103 | Benign               | 0.08 | Tolerant | -3.53 | Deleterious | 0.766 | Disease | 0.423 | Neutral      | Benign             |
| 101 | rs763697017  | NM_053056.2:c.556G>A,<br>NP_444284.1:p.Val186Ile  | 0.002 | Benign               | 1.00 | Tolerant | 0.29  | Neutral     | 0.346 | Neutral | 0.284 | Neutral      | Benign             |
| 102 | rs1252289930 | NM_053056.2:c.560C>T,<br>NP_444284.1:p.Ala187Val  | 0.912 | Possibly<br>damaging | 0.06 | Tolerant | -3.58 | Deleterious | 0.940 | Disease | 0.440 | Neutral      | Highly<br>Damaging |
| 103 | rs751315372  | NM_053056.2:c.562C>T,<br>NP_444284.1:p.Leu188Phe  | 1     | Probably<br>Damaging | 0.00 | Damaging | -3.76 | Deleterious | 0.973 | Disease | 0.838 | Disease      | Highly<br>Damaging |
| 104 | rs757229078  | NM_053056.2:c.566G>A,<br>NP_444284.1:p.Cys189Tyr  | 1     | Probably<br>Damaging | 0.00 | Damaging | -9.72 | Deleterious | 0.982 | Disease | 0.706 | Disease      | Highly<br>Damaging |
| 105 | rs534553548  | NM_053056.2:c.568G>T,<br>NP_444284.1:p.Ala190Ser  | 0.894 | Possibly<br>damaging | 0.12 | Tolerant | -2.2  | Neutral     | 0.942 | Disease | 0.635 | Disease      | Highly<br>Damaging |
| 106 | rs201012923  | NM_053056.2:c.577G>A,<br>NP_444284.1:p.Val193Met  | 0.013 | Benign               | 0.14 | Tolerant | -0.55 | Neutral     | 0.871 | Disease | 0.415 | Neutral      | Benign             |
| 107 | rs1282637304 | NM_053056.2:c.582G>T,<br>NP_444284.1:p.Lys194Asn  | 0.02  | Benign               | 0.34 | Tolerant | -2.21 | Neutral     | 0.841 | Disease | 0.485 | Neutral      | Benign             |
| 108 | rs759570740  | NM_053056.2:c.593A>G,<br>NP_444284.1:p.Asn198Ser  | 0.02  | Benign               | 0.60 | Tolerant | -1.22 | Neutral     | 0.769 | Disease | 0.386 | Neutral      | Benign             |
| 109 | rs1222442441 | NM_053056.2:c.596C>T,<br>NP_444284.1:p.Pro199Leu  | 0.998 | Probably<br>Damaging | 0.00 | Damaging | -7.42 | Deleterious | 0.776 | Disease | 0.377 | Neutral      | Highly<br>Damaging |

|     |              |                                                   |       |                      |      |          |       |             |       |         |       |              |                    |
|-----|--------------|---------------------------------------------------|-------|----------------------|------|----------|-------|-------------|-------|---------|-------|--------------|--------------------|
| 110 | rs1353308163 | NM_053056.2:c.598C>T,<br>NP_444284.1:p.Pro200Ser  | 1     | Probably<br>Damaging | 0.00 | Damaging | -7.2  | Deleterious | 0.969 | Disease | 0.831 | Disease      | Highly<br>Damaging |
| 111 | rs893823618  | NM_053056.2:c.607G>T,<br>NP_444284.1:p.Val203Leu  | 0.004 | Benign               | 0.07 | Tolerant | -1.29 | Neutral     | 0.853 | Disease | 0.357 | Neutral      | Benign             |
| 112 | rs751664590  | NM_053056.2:c.610G>A,<br>NP_444284.1:p.Ala204Thr  | 1     | Probably<br>Damaging | 0.00 | Damaging | -3.6  | Deleterious | 0.974 | Disease | 0.895 | Disease      | Highly<br>Damaging |
| 113 | rs1193747086 | NM_053056.2:c.613G>T,<br>NP_444284.1:p.Ala205Ser  | 0.996 | Probably<br>Damaging | 0.09 | Tolerant | -1.29 | Neutral     | 0.959 | Disease | 0.756 | Disease      | Highly<br>Damaging |
| 114 | rs1271260640 | NM_053056.2:c.614C>T,<br>NP_444284.1:p.Ala205Val  | 1     | Probably<br>Damaging | 0.01 | Damaging | -2.42 | Neutral     | 0.957 | Disease | 0.689 | Disease      | Highly<br>Damaging |
| 115 | rs1011426441 | NM_053056.2:c.622G>A,<br>NP_444284.1:p.Val208Met  | 0.977 | Probably<br>Damaging | 0.09 | Tolerant | -1.82 | Neutral     | 0.781 | Disease | 0.379 | Neutral      | Benign             |
| 116 | rs750639632  | NM_053056.2:c.626T>C,<br>NP_444284.1:p.Val209Ala  | 0     | Benign               | 1.00 | Tolerant | 0.72  | Neutral     | 0.697 | Disease | 0.325 | Neutral      | Benign             |
| 117 | rs756509430  | NM_053056.2:c.631G>A,<br>NP_444284.1:p.Ala211Thr  | 1     | Probably<br>Damaging | 0.00 | Damaging | -3.47 | Deleterious | 0.968 | Disease | 0.706 | Disease      | Highly<br>Damaging |
| 118 | rs112525097  | NM_053056.2:c.648C>G,<br>NP_444284.1:p.Asn216Lys  | 0     | Benign               | 0.63 | Tolerant | -1.27 | Neutral     | 0.863 | Disease | 0.376 | Neutral      | Benign             |
| 119 | rs149457002  | NM_053056.2:c.656G>A,<br>NP_444284.1:p.Ser219Asn  | 0     | Benign               | 0.52 | Tolerant | -1.22 | Neutral     | 0.876 | Disease | 0.289 | Neutral      | Benign             |
| 120 | rs1404273153 | NM_053056.2:c.658C>T,<br>NP_444284.1:p.Pro220Ser  | 0     | Benign               | 0.89 | Tolerant | 0.44  | Neutral     | 0.805 | Disease | NA    | Unclassified | Benign             |
| 121 | rs747703578  | NM_053056.2:c.659C>T,<br>NP_444284.1:p.Pro220Leu  | 0     | Benign               | 0.35 | Tolerant | -1.96 | Neutral     | 0.818 | Disease | NA    | Unclassified | Benign             |
| 122 | rs1412188214 | NM_053056.2:c.661A>C,<br>NP_444284.1:p.Asn221His  | 0.159 | Benign               | 0.12 | Tolerant | -2.37 | Neutral     | 0.920 | Disease | 0.652 | Disease      | Benign             |
| 123 | rs746640562  | NM_053056.2:c.670C>A,<br>NP_444284.1:p.Leu224Met  | 0.034 | Benign               | 0.22 | Tolerant | -0.36 | Neutral     | 0.918 | Disease | 0.649 | Disease      | Benign             |
| 124 | rs776600964  | NM_053056.2:c.677A>G,<br>NP_444284.1:p.Tyr226Cys, | 0     | Benign               | 0.18 | Tolerant | -1.42 | Neutral     | 0.853 | Disease | 0.235 | Neutral      | Benign             |
|     |              | NM_053056.2:c.677A>T,<br>NP_444284.1:p.Tyr226Phe  | 0.002 | Benign               | 0.70 | Tolerant | -0.93 | Neutral     | 0.816 | Disease | 0.262 | Neutral      | Benign             |
| 125 | rs1222446202 | NM_053056.2:c.682C>T,<br>NP_444284.1:p.Arg228Cys  | 0.004 | Benign               | 0.05 | Tolerant | -3.18 | Deleterious | 0.754 | Disease | 0.203 | Neutral      | Benign             |
| 126 | rs200179137  | NM_053056.2:c.683G>A,<br>NP_444284.1:p.Arg228His  | 0     | Benign               | 0.13 | Tolerant | -1.33 | Neutral     | 0.909 | Disease | 0.572 | Disease      | Benign             |

|     |              |                                                                           |       |                      |      |          |       |             |       |         |       |         |                    |
|-----|--------------|---------------------------------------------------------------------------|-------|----------------------|------|----------|-------|-------------|-------|---------|-------|---------|--------------------|
| 127 | rs984643266  | NM_053056.2:c.689C>T,<br>NP_444284.1:p.Thr230Ile,                         | 0.476 | Possibly<br>damaging | 0.60 | Tolerant | -2.52 | Deleterious | 0.940 | Disease | 0.570 | Disease | Highly<br>Damaging |
|     |              | NM_053056.2:c.689C>A,<br>NP_444284.1:p.Thr230Lys                          | 0.998 | Probably<br>Damaging | 0.06 | Tolerant | -3.71 | Deleterious | 0.934 | Disease | 0.255 | Neutral | Highly<br>Damaging |
| 128 | rs745779714  | NM_053056.2:c.691C>T,<br>NP_444284.1:p.Arg231Cys,                         | 0.495 | Possibly<br>damaging | 0.03 | Damaging | -3.35 | Deleterious | 0.889 | Disease | 0.410 | Neutral | Highly<br>Damaging |
|     |              | NM_053056.2:c.691C>G,<br>NP_444284.1:p.Arg231Gly,                         | 0     | Benign               | 0.20 | Tolerant | -1.83 | Neutral     | 0.860 | Disease | 0.325 | Neutral | Benign             |
|     |              | NM_053056.2:c.691C>A,<br>NP_444284.1:p.Arg231Ser                          | 0     | Benign               | 0.40 | Tolerant | -0.58 | Neutral     | 0.838 | Disease | 0.403 | Neutral | Benign             |
| 129 | rs1228811654 | NM_053056.2:c.697C>A,<br>NP_444284.1:p.Leu233Ile                          | 0.998 | Probably<br>Damaging | 0.05 | Tolerant | -1.63 | Neutral     | 0.886 | Disease | 0.507 | Disease | Highly<br>Damaging |
| 130 | rs1165177408 | NM_053056.2:c.700T>A,<br>NP_444284.1:p.Ser234Thr                          | 0.001 | Benign               | 0.89 | Tolerant | -1.08 | Neutral     | 0.716 | Disease | 0.479 | Neutral | Benign             |
| 131 | rs1423874357 | NM_053056.2:c.712A>C,<br>NP_444284.1:p.Lys238Gln                          | 0     | Benign               | 0.23 | Tolerant | -1.09 | Neutral     | 0.723 | Disease | 0.506 | Disease | Benign             |
| 132 | rs760907398  | NM_053056.2:c.714G>A,<br>NM_053056.2:c.714G>C,<br>NP_444284.1:p.Lys238Asn | 0     | Benign               | 0.89 | Tolerant | 0.2   | Neutral     | 0.777 | Disease | 0.547 | Disease | Benign             |
| 133 | rs777225097  | NM_053056.2:c.722C>T,<br>NP_444284.1:p.Pro241Leu                          | 0.001 | Benign               | 0.33 | Tolerant | -2.98 | Deleterious | 0.507 | Disease | 0.265 | Neutral | Benign             |
| 134 | rs913470506  | NM_053056.2:c.733C>T,<br>NP_444284.1:p.Arg245Trp                          | 1     | Probably<br>Damaging | 0.00 | Damaging | -5.99 | Deleterious | 0.933 | Disease | 0.875 | Disease | Highly<br>Damaging |
| 135 | rs925960764  | NM_053056.2:c.736G>T,<br>NP_444284.1:p.Ala246Ser                          | 0.008 | Benign               | 0.23 | Tolerant | -1.31 | Neutral     | 0.797 | Disease | 0.373 | Neutral | Benign             |
| 136 | rs1417190579 | NM_053056.2:c.740G>T,<br>NP_444284.1:p.Cys247Phe,                         | 1     | Probably<br>Damaging | 0.00 | Damaging | -9.74 | Deleterious | 0.956 | Disease | 0.310 | Neutral | Highly<br>Damaging |
|     |              | NM_053056.2:c.740G>A,<br>NP_444284.1:p.Cys247Tyr                          | 1     | Probably<br>Damaging | 0.00 | Damaging | -9.63 | Deleterious | 0.980 | Disease | 0.427 | Neutral | Highly<br>Damaging |
| 137 | rs1446903472 | NM_053056.2:c.748C>A,<br>NP_444284.1:p.Gln250Lys                          | 0.92  | Possibly<br>damaging | 0.02 | Damaging | -3.28 | Deleterious | 0.878 | Disease | 0.246 | Neutral | Highly<br>Damaging |



|     |              |                                                   |       |                      |      |          |       |             |       |         |       |         |                    |
|-----|--------------|---------------------------------------------------|-------|----------------------|------|----------|-------|-------------|-------|---------|-------|---------|--------------------|
| 138 | rs1377678585 | NM_053056.2:c.749A>G,<br>NP_444284.1:p.Gln250Arg  | 0.516 | Possibly<br>damaging | 0.11 | Tolerant | -3.24 | Deleterious | 0.782 | Disease | 0.245 | Neutral | Highly<br>Damaging |
| 139 | rs1173812710 | NM_053056.2:c.754G>A,<br>NP_444284.1:p.Glu252Lys  | 1     | Probably<br>Damaging | 0.00 | Damaging | -3.58 | Deleterious | 0.946 | Disease | 0.313 | Neutral | Highly<br>Damaging |
| 140 | rs750012493  | NM_053056.2:c.773G>C,<br>NP_444284.1:p.Ser258Thr  | 0.23  | Benign               | 0.01 | Damaging | -2.06 | Deleterious | 0.752 | Disease | 0.180 | Neutral | Highly<br>Damaging |
| 141 | rs755986542  | NM_053056.2:c.778C>T,<br>NP_444284.1:p.Arg260Cys  | 0.262 | Benign               | 0.11 | Tolerant | -3.86 | Neutral     | 0.942 | Disease | 0.706 | Disease | Benign             |
| 142 | rs779733976  | NM_053056.2:c.779G>A,<br>NP_444284.1:p.Arg260His  | 0.99  | Probably<br>Damaging | 0.13 | Tolerant | -2.41 | Deleterious | 0.907 | Disease | 0.457 | Neutral | Highly<br>Damaging |
| 143 | rs749069429  | NM_053056.2:c.782A>G,<br>NP_444284.1:p.Gln261Arg, | 0.007 | Benign               | 0.07 | Tolerant | -2.06 | Neutral     | 0.765 | Disease | 0.159 | Neutral | Benign             |
|     |              | NM_053056.2:c.782A>C,<br>NP_444284.1:p.Gln261Pro  | 0.004 | Benign               | 0.08 | Tolerant | -3.36 | Deleterious | 0.950 | Disease | 0.453 | Neutral | Benign             |
| 145 | rs1306960346 | NM_053056.2:c.787C>G,<br>NP_444284.1:p.Gln263Glu  | 0.008 | Benign               | 0.23 | Tolerant | -1.29 | Neutral     | 0.816 | Disease | 0.212 | Neutral | Benign             |
| 146 | rs768582800  | NM_053056.2:c.790C>A,<br>NP_444284.1:p.Gln264Lys  | 0.035 | Benign               | 0.36 | Tolerant | -1.89 | Neutral     | 0.841 | Disease | 0.166 | Neutral | Benign             |
| 147 | rs1225491115 | NM_053056.2:c.797T>C,<br>NP_444284.1:p.Met266Thr  | 0     | Benign               | 0.60 | Tolerant | -0.01 | Neutral     | 0.571 | Disease | 0.184 | Neutral | Benign             |
| 148 | rs377271027  | NM_053056.2:c.800A>G,<br>NP_444284.1:p.Asp267Gly  | 0     | Benign               | 0.40 | Tolerant | -1.25 | Neutral     | 0.636 | Disease | 0.288 | Neutral | Benign             |
| 149 | rs1323012735 | NM_053056.2:c.802C>A,<br>NP_444284.1:p.Pro268Thr  | 0.067 | Benign               | 0.58 | Tolerant | -1.43 | Neutral     | 0.595 | Disease | 0.219 | Neutral | Benign             |
| 150 | rs1252799046 | NM_053056.2:c.808G>A,<br>NP_444284.1:p.Ala270Thr  | 0.033 | Benign               | 0.61 | Tolerant | -0.66 | Neutral     | 0.655 | Disease | 0.223 | Neutral | Benign             |
| 151 | rs770991095  | NM_053056.2:c.809C>T,<br>NP_444284.1:p.Ala270Val  | 0.033 | Benign               | 0.33 | Tolerant | -0.75 | Neutral     | 0.357 | Neutral | 0.246 | Neutral | Benign             |
| 152 | rs759765773  | NM_053056.2:c.811G>A,<br>NP_444284.1:p.Ala271Thr  | 0     | Benign               | 0.77 | Tolerant | 0.72  | Neutral     | 0.402 | Neutral | 0.150 | Neutral | Benign             |
| 153 | rs770021448  | NM_053056.2:c.812C>A,<br>NP_444284.1:p.Ala271Asp  | 0     | Benign               | 0.68 | Tolerant | -0.58 | Neutral     | 0.681 | Disease | 0.125 | Neutral | Benign             |
| 154 | rs775723921  | NM_053056.2:c.814G>A,<br>NP_444284.1:p.Glu272Lys  | 0.007 | Benign               | 0.83 | Tolerant | 0.24  | Neutral     | 0.590 | Disease | 0.144 | Neutral | Benign             |
| 155 | rs764757265  | NM_053056.2:c.821A>T,<br>NP_444284.1:p.Glu274Val  | 0.001 | Benign               | 0.28 | Tolerant | -0.98 | Neutral     | 0.649 | Disease | 0.378 | Neutral | Benign             |

|     |              |                                                                           |       |                   |      |          |       |             |       |         |       |              |                 |
|-----|--------------|---------------------------------------------------------------------------|-------|-------------------|------|----------|-------|-------------|-------|---------|-------|--------------|-----------------|
| 156 | rs752108957  | NM_053056.2:c.823G>C,<br>NP_444284.1:p.Glu275Gln                          | 0.005 | Benign            | 0.55 | Tolerant | -0.2  | Neutral     | 0.398 | Neutral | 0.140 | Neutral      | Benign          |
| 157 | rs1436128793 | NM_053056.2:c.827A>T,<br>NP_444284.1:p.Glu276Val                          | 0.047 | Benign            | 0.15 | Tolerant | -1.14 | Neutral     | 0.711 | Disease | 0.484 | Neutral      | Benign          |
| 158 | rs200912411  | NM_053056.2:c.836A>C,<br>NP_444284.1:p.Glu279Ala                          | 0     | Benign            | 0.60 | Tolerant | -1.06 | Neutral     | 0.383 | Neutral | 0.188 | Neutral      | Benign          |
| 159 | rs749899296  | NM_053056.2:c.845A>G,<br>NP_444284.1:p.Asp282Gly,                         | 0.002 | Benign            | 0.11 | Tolerant | -1.29 | Neutral     | 0.691 | Disease | 0.219 | Neutral      | Benign          |
|     |              | NM_053056.2:c.845A>T,<br>NP_444284.1:p.Asp282Val                          | 0.425 | Benign            | 0.03 | Damaging | -2.72 | Deleterious | 0.648 | Disease | 0.209 | Neutral      | Highly Damaging |
| 160 | rs755753468  | NM_053056.2:c.847C>G,<br>NP_444284.1:p.Leu283Val                          | 0.037 | Benign            | 0.45 | Tolerant | -0.80 | Neutral     | 0.387 | Neutral | 0.146 | Neutral      | Benign          |
| 161 | rs754752470  | NM_053056.2:c.853T>A,<br>NP_444284.1:p.Cys285Ser                          | 0.001 | Benign            | 1    | Tolerant | -0.72 | Neutral     | 0.496 | Neutral | 0.272 | Neutral      | Benign          |
| 162 | rs1168483993 | NM_053056.2:c.854G>T,<br>NP_444284.1:p.Cys285Phe                          | 0.28  | Benign            | 0.56 | Tolerant | -3.4  | Deleterious | 0.923 | Disease | 0.496 | Neutral      | Benign          |
| 163 | rs771951669  | NM_053056.2:c.865G>A,<br>NP_444284.1:p.Asp289Asn                          | 1     | Probably Damaging | 0.01 | Damaging | -4.27 | Deleterious | 0.834 | Disease | 0.184 | Neutral      | Highly Damaging |
| 164 | rs781165229  | NM_053056.2:c.867C>A,<br>NM_053056.2:c.867C>T,<br>NP_444284.1:p.Asp289Glu | 1     | Probably Damaging | 0.03 | Damaging | -3.35 | Deleterious | 0.842 | Disease | 0.203 | Neutral      | Highly Damaging |
| 165 | rs769921935  | NM_053056.2:c.868G>C,<br>NP_444284.1:p.Val290Leu,                         | 0.99  | Probably Damaging | 0.09 | Tolerant | -2.19 | Neutral     | 0.821 | Disease | 0.317 | Neutral      | Benign          |
|     |              | NM_053056.2:c.868G>A,<br>NP_444284.1:p.Val290Met                          | 0.998 | Probably Damaging | 0.00 | Damaging | -2.29 | Neutral     | 0.788 | Disease | 0.475 | Neutral      | Highly Damaging |
| 166 | rs1292246537 | NM_053056.2:c.871C>T,<br>NP_444284.1:p.Arg291Trp                          | 0.999 | Probably Damaging | 0.03 | Damaging | -4.86 | Deleterious | 0.875 | Disease | 0.799 | Disease      | Highly Damaging |
| 167 | rs775768459  | NM_053056.2:c.872G>A,<br>NP_444284.1:p.Arg291Gln,                         | 0.325 | Benign            | 0.31 | Tolerant | -1.3  | Neutral     | 0.570 | Disease | 0.368 | Neutral      | Benign          |
|     |              | NM_053056.2:c.872G>T,<br>NP_444284.1:p.Arg291Leu                          | 0.212 | Benign            | 0.81 | Tolerant | -3.88 | Deleterious | 0.863 | Disease | NA    | Unclassified | Benign          |
| 168 | rs535957987  | NM_053056.2:c.876C>G,<br>NP_444284.1:p.Asp292Glu                          | 0.994 | Probably Damaging | 0.15 | Tolerant | -2.56 | Deleterious | 0.785 | Disease | 0.257 | Neutral      | Highly damaging |

|     |              |                                                  |       |                      |      |          |       |         |       |         |       |         |        |
|-----|--------------|--------------------------------------------------|-------|----------------------|------|----------|-------|---------|-------|---------|-------|---------|--------|
| 169 | rs1225090625 | NM_053056.2:c.877G>A,<br>NP_444284.1:p.Val293Met | 0.999 | Probably<br>Damaging | 0.08 | Tolerant | -2.07 | Neutral | 0.709 | Disease | 0.342 | Neutral | Benign |
|-----|--------------|--------------------------------------------------|-------|----------------------|------|----------|-------|---------|-------|---------|-------|---------|--------|

<sup>a</sup> PolyPhen-2= Polymorphism Phenotyping v2, Scores near to 1 are more confidently predicting the SNP to be damaging. <http://genetics.bwh.harvard.edu/pph2/>

<sup>b</sup> SIFT= Sorting Intolerant From Tolerant, SNP scores near 0.00 are more predicted as damaging. <http://sift.bii.a-star.edu.sg/>

<sup>c</sup> PROVEAN= Protein Variation Effect Analyzer, cut off -2.5, scores equal to or above this threshold are predicting the SNP as deleterious <http://provean.jcvi.org/index.php>

<sup>d</sup> SNP & GO= scores equal or above 0.5 are predicting the SNP as diseased <http://snps.biofold.org/snps-and-go/snps-and-go.html>

<sup>e</sup> PANTHER= PANTHER scores are given along with SNP & GO scores, scores equal or above 0.5 are predicting the SNP as diseased <http://snps.biofold.org/snps-and-go/snps-and-go.html>

<sup>f</sup> SNPs predicted as damaging by three or more tools are classified as “highly damaging” and selected for further *in silico* analysis (colored as red).

Supplementary Table 3. SNPeffect web server molecular phenotypic prediction

| SNP rs ID and amino acid change  | TANGO   |                                                       | WALTZ  |                                                     | LIMBO  |                                                             |
|----------------------------------|---------|-------------------------------------------------------|--------|-----------------------------------------------------|--------|-------------------------------------------------------------|
|                                  | Scores  | Prediction                                            | Scores | Prediction                                          | Scores | Prediction                                                  |
| <b>rs557545630</b><br>Arg15Ser   | -2.17   | does not affect the aggregation tendency of cyclin D1 | 0.08   | does not affect the amyloid propensity of cyclin D1 | 0.00   | does not affect the chaperone binding tendency of cyclin D1 |
| <b>rs534553548</b><br>Ala190Ser  | -141.12 | decreases the aggregation tendency of cyclin D1       | 8.07   | does not affect the amyloid propensity of cyclin D1 | 0.00   | does not affect the chaperone binding tendency of cyclin D1 |
| <b>rs535957987</b><br>Asp292Glu  | 0.00    | does not affect the aggregation tendency of cyclin D1 | 0.00   | does not affect the amyloid propensity of cyclin D1 | 0.00   | does not affect the chaperone binding tendency of cyclin D1 |
| <b>rs143479406</b><br>Arg179His, | -2.01   | does not affect the aggregation tendency of cyclin D1 | 0.10   | does not affect the amyloid propensity of cyclin D1 | 0.00   | does not affect the chaperone binding tendency of cyclin D1 |
| <b>rs143479406</b><br>Arg179Leu  | -2.19   | does not affect the aggregation tendency of cyclin D1 | 5.85   | does not affect the amyloid propensity of cyclin D1 | -0.20  | does not affect the chaperone binding tendency of cyclin D1 |
